# Supplementary material for: Anisotropic ionic liquids built from nonmesogenic cation surfactants and Keggin-type polyoxoanions
Source: Royal Society of Chemistry journal article supplement (doi:10.1039/c1cc13721b), 2011-01-01
Supplement: c1cc13721b.pdf [file c1cc13721b.pdf]

## Supporting Information

# Anisotropic ionic liquids built from nonmesogenic cation surfactants and Keggin-type polyoxoanions

Yunxia Jiang,<sup>a</sup> Shuxia Liu,<sup>\*a</sup> Shujun Li,<sup>a</sup> Jun Miao,<sup>a</sup> Jing Zhang<sup>b</sup> and Lixin Wu<sup>\*b</sup>

<sup>a</sup> Key Laboratory of Polyoxometalate Science of Ministry of Education, College of Chemistry, Northeast Normal University, Changchun, China.

<sup>b</sup> State Key Laboratory of Supramolecular Structure and Materials, Jilin University, Changchun, China.

---

\* To whom correspondence should be addressed. E-mail: liusx@nenu.edu.cn

## Table of Contents

### 1. Experimental Section

### 2. IR spectra

### 3. TGA curves

### 4. DSC Measurements

### 5. Temperature dependent FT-IR spectra of TGeW

### 6. X-ray diffraction of TBW

### 7. Single Crystal X-ray Crystallographic Analysis of TPW

### 8. References

## 1. Experimental Section

**(1). Materials.** All chemicals were obtained commercially and used without additional purification. The  $\text{H}_3\text{PW}_{12}\text{O}_{40}$ ,  $\text{H}_4\text{GeW}_{12}\text{O}_{40}$ ,  $\text{K}_5\text{BW}_{12}\text{O}_{40}$  were freshly prepared according to the procedure described in the literature<sup>1</sup> and characterized by IR spectra. All other reagents were readily available from commercial sources and used as received without further purification.

### **(2). Synthesis.**

**TPW** was synthesized as follows:  $\text{H}_3\text{PW}_{12}\text{O}_{40}$  was dissolved in aqueous solution and then methylene chloride solution of TOA·Br was added dropwise. The initial molar ratio of TOA·Br to  $\text{H}_3\text{PW}_{12}\text{O}_{40}$  was controlled at 3:1. After stirring for 1 hour at room temperature, the organic phase was separated, evaporated, and dried until the weight remained constant. The product obtained was white solid. IR (KBr,  $\text{cm}^{-1}$ ):  $\nu = 2954, 2926, 2852, 1479, 1379, 1081, 981, 898, 818, 595, 515$ . Anal. Calcd for **TPW** ( $\text{C}_{96}\text{H}_{204}\text{N}_3\text{O}_{40}\text{PW}_{12}$ , 4277.67): C, 26.93; H, 4.77; N, 0.98. Found: C, 27.05; H, 4.86; N, 0.91. TGA suggests **TPW** is thermally stable up to ca. 350 °C and no significant loss of weight occurs below this temperature. Combining the results of EA and TGA, **TPW** should correspond to a tentative formula:  $[(\text{C}_8\text{H}_{17})_4\text{N}]_3[\text{PW}_{12}\text{O}_{40}]$ .

Crystals suitable for single-crystal X-ray crystallography were grown for **TPW** from ethanol/dichloromethane mixture (1:1 by volume, 20 mL) by slow evaporation at room temperature.

**TGeW** was synthesized following a similar procedure as for **TPW** by using  $\text{H}_4\text{GeW}_{12}\text{O}_{40}$  instead. The initial molar ratio of TOA·Br to  $\text{H}_4\text{GeW}_{12}\text{O}_{40}$  was controlled at 4:1. The product was white waxy solid. IR (KBr,  $\text{cm}^{-1}$ ):  $\nu = 2955, 2926, 2855, 1468, 1377, 966, 885, 830, 784, 535, 464$ . Anal. Calcd for **TGeW** ( $\text{C}_{128}\text{H}_{272}\text{N}_4\text{O}_{40}\text{GeW}_{12}$ , 4786.25): C, 32.10; H, 5.68; N, 1.17. Found: C, 32.65; H, 5.96; N, 1.12. TGA suggests **TGeW** is thermally stable up to ca. 200 °C and no significant loss of

weight occurs below this temperature. Combining the results of EA and TGA, **TGeW** should correspond to a tentative formula:  $[(C_8H_{17})_4N]_4[GeW_{12}O_{40}]$ .

**TBW** was synthesized following a similar procedure as for **TPW** by using  $K_5BW_{12}O_{40}$  instead. The initial molar ratio of TOA·Br to  $K_5BW_{12}O_{40}$  was controlled at 5:1. The product was white waxy solid. IR (KBr,  $cm^{-1}$ ):  $\nu = 2955, 2925, 2854, 1467, 1378, 991, 948, 899, 823, 724, 530, 506, 423$ . Anal. Calcd for **TBW** ( $C_{160}H_{340}N_5O_{40}BW_{12}$ , 5191.31): C, 36.98; H, 6.55; N, 1.35. Found: C, 37.44; H, 6.58; N, 1.34. TGA suggests **TBW** is thermally stable up to ca. 200 °C and no significant loss of weight occurs below this temperature. Combining the results of EA and TGA, **TBW** should correspond to a tentative formula:  $[(C_8H_{17})_4N]_5[BW_{12}O_{40}]$ .

**(3). Characterization Methods.** The IR spectra in KBr pellets were recorded in the range 400-4000  $cm^{-1}$  with an Alpha Centaur FT/IR spectrophotometer. Elemental analysis (C, H, N) was performed on a Flash EA1112 from Thermo Quest Italia SPA. Thermal properties of the complexes were determined by differential scanning calorimetry (DSC) and thermogravimetric analysis (TGA). DSC measurements were performed on a Netzsch DSC 204 at a scanning rate for both heating and cooling of 5 °C  $min^{-1}$ . The samples were sealed in aluminum capsules in air, and the holder atmosphere was dry nitrogen. TGA analyses were carried out by using a Perkin-Elmer TGA7 instrument, with a heating rate of 10 °C  $min^{-1}$ , under a nitrogen atmosphere. The texture of the compounds was observed by using an Axioskop 40 polarizing optical microscope of (Carl Zeiss Light Microscopy, Germany) equipped with a LINKAM THMS 600 hot stage and a LINKAM CI 94 temperature controller. For variable-temperature XRD measurements, a Bruker AXS D8 ADVANCE X-ray diffractometer using Cu  $K\alpha$  radiation of a wavelength of 0.154 nm with an mri Physikalische Geräte GmbH TC-Basic temperature chamber was used.

## 2. IR spectra

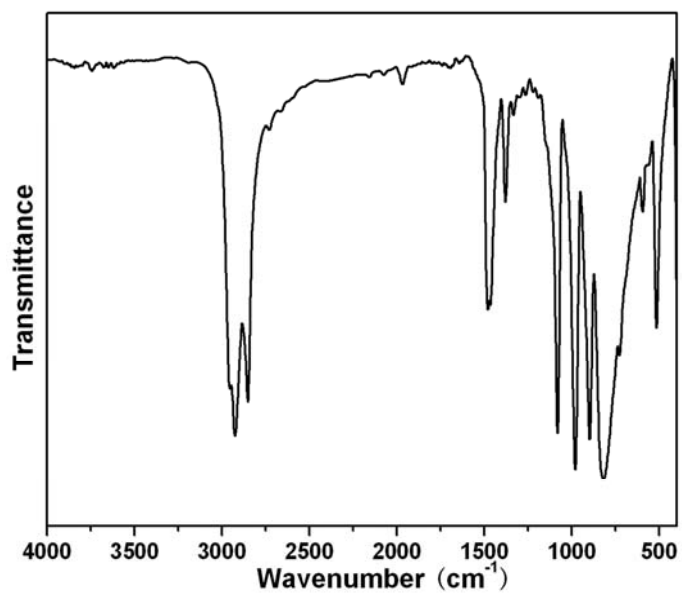

**Figure S1.** IR spectrum of TPW.

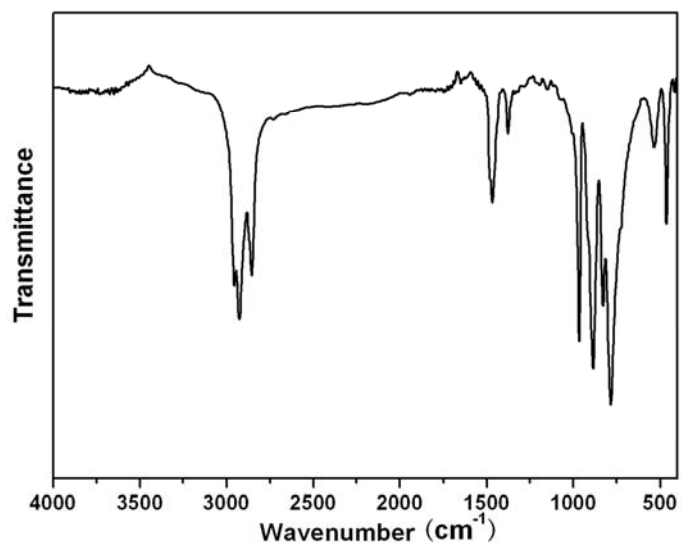

**Figure S2.** IR spectrum of TGeW.

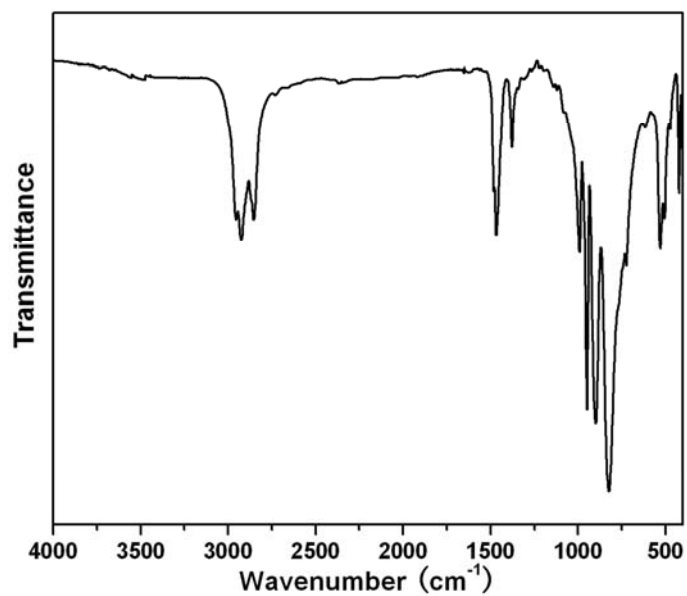

**Figure S3.** IR spectrum of TBW.

### 3. TGA curves

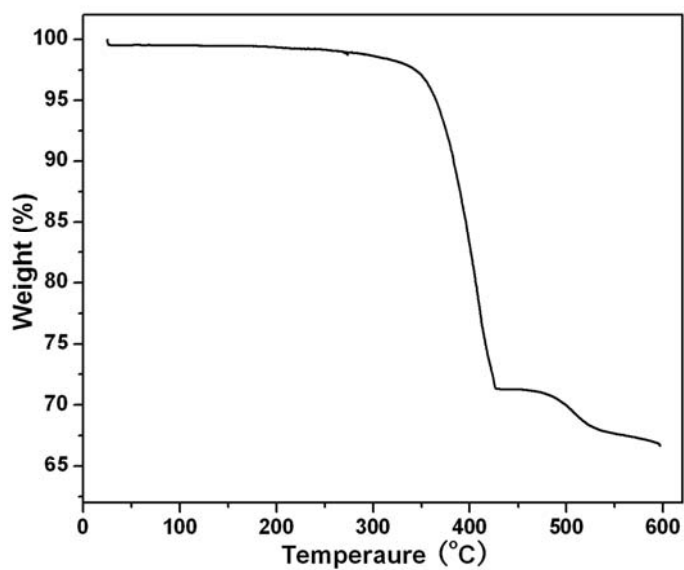

**Figure S4.** TGA curve of TPW.

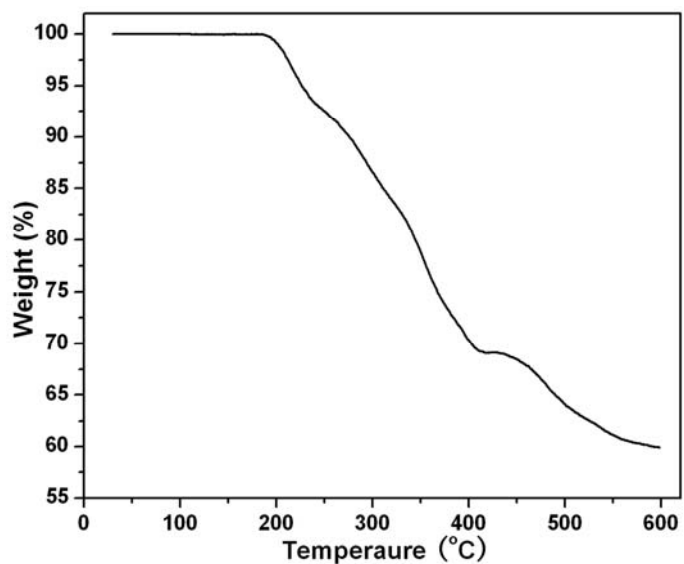

**Figure S5.** TGA curve of TGeW.

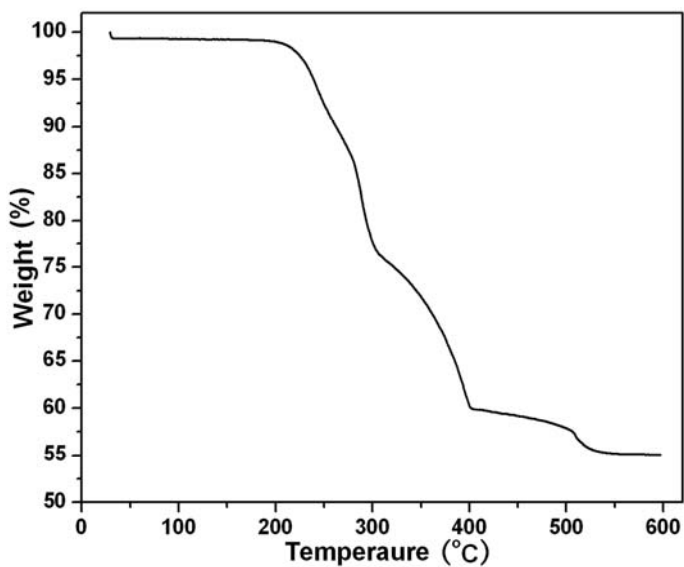

**Figure S6.** TGA curve of TBW.

#### 4. DSC Measurements

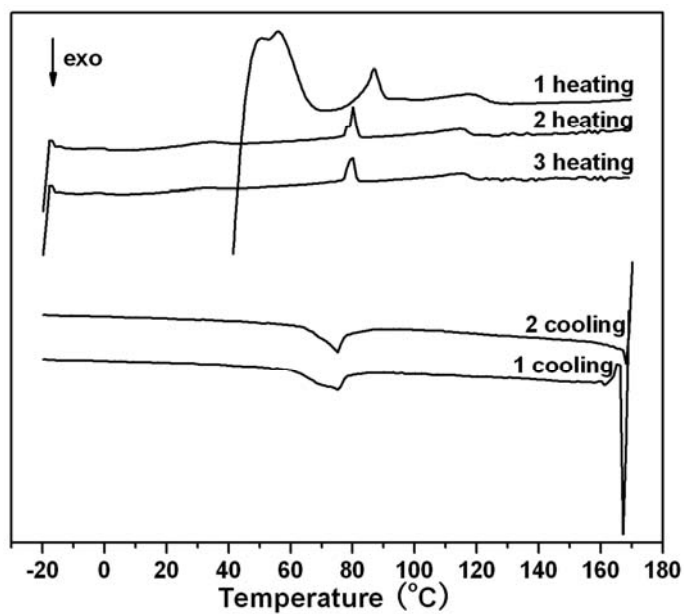

**Figure S7.** DSC curves of TGeW at a scanning rate of 5 °C min<sup>-1</sup>.

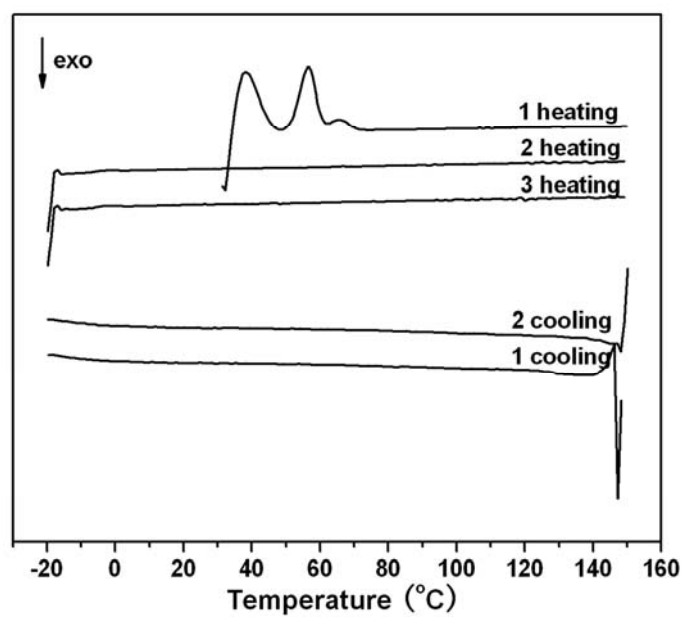

**Figure S8.** DSC curves of TBW at a scanning rate of 5 °C min<sup>-1</sup>.

## 5. Temperature dependent FT-IR spectra of TGeW

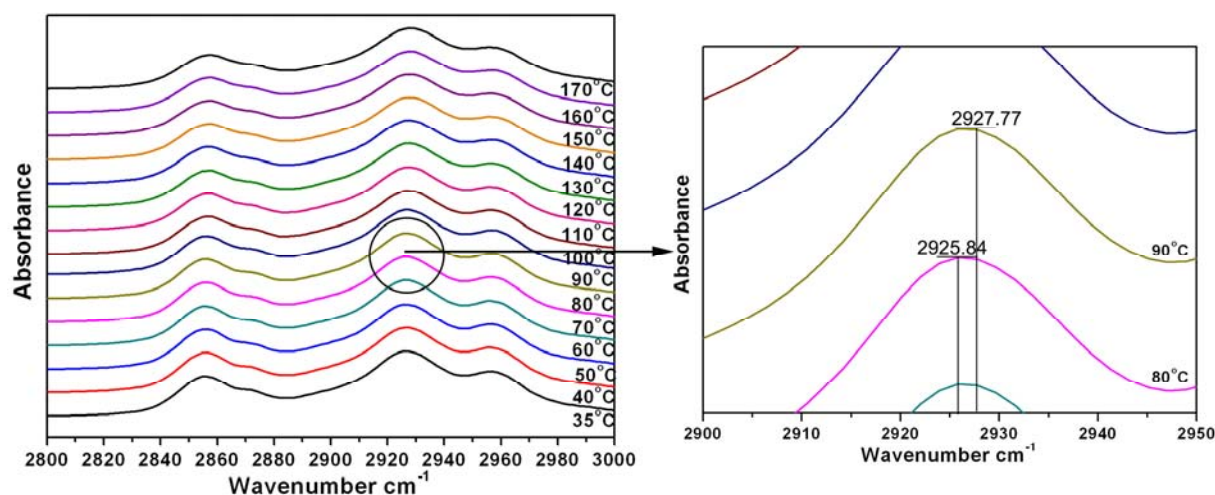

Figure S9. Temperature dependent FT-IR spectra of TGeW.

## 6. X-ray diffraction of TBW

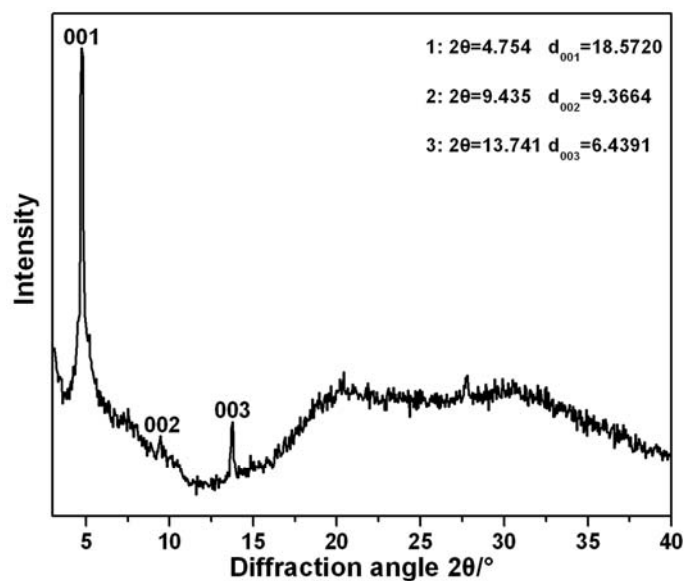

Figure S10. X-ray characterization of TBW at room temperature.

## 7. X-ray Structural Studies.

Single-crystal diffractometry of TPW was conducted on a Bruker Smart Apex CCD diffractometer with Mo K $\alpha$  monochromated radiation ( $\lambda = 0.71073 \text{ \AA}$ ) at room temperature. The linear absorption coefficients, scattering factors for the atoms, and anomalous dispersion corrections were taken from the International Tables for X-Ray Crystallography.<sup>2</sup> Empirical absorption



corrections were applied. The structures were solved by using the direct method and refined through the full-matrix least-squares method on  $F^2$  using SHELXS-97.<sup>3</sup> Anisotropic thermal parameters were used to refine all non-hydrogen atoms. Hydrogen atoms on the TOA cations were placed on calculated positions and included in the refinement riding on their respective parent atoms. CCDC-788692 contains the supplementary crystallographic data for this paper. These data can be obtained free of charge at <http://www.ccdc.cam.ac.uk/conts/retrieving.html> (or from the Cambridge Crystallographic Data Centre, 12, Union Road, Cambridge CB2 1EZ, UK; fax: +44-1223/336-033; e-mail: [deposit@ccdc.cam.ac.uk](mailto:deposit@ccdc.cam.ac.uk)). The crystal data and structure refinement results of **TPW** are summarized in Table S1.

**Table S1.** Crystal Data and Structural Refinement for Compounds **TPW**

|                                       | <b>TPW</b>                      |
|---------------------------------------|---------------------------------|
| Formula                               | $C_{96}H_{204}N_3O_{40}PW_{12}$ |
| Formula weight ( $g\text{mol}^{-1}$ ) | 4277.67                         |
| $T$ (K)                               | 296                             |
| Wavelength ( $\text{\AA}$ )           | 0.71073                         |
| Crystal system                        | trigonal                        |
| Space group                           | R -3c                           |
| $a$ ( $\text{\AA}$ )                  | 24.4709(18)                     |
| $b$ ( $\text{\AA}$ )                  | 24.4709(18)                     |
| $c$ ( $\text{\AA}$ )                  | 39.112(3)                       |
| $V$ ( $\text{\AA}^3$ )                | 20283(3)                        |
| $Z$                                   | 6                               |
| $D_{calc}$ ( $g\text{cm}^{-3}$ )      | 2.101                           |
| $\mu$ ( $\text{mm}^{-1}$ )            | 10.241                          |
| $F(000)$                              | 12144.0                         |

|                                       |                                      |
|---------------------------------------|--------------------------------------|
| Crystal size (mm)                     | 0.20×0.18×0.16                       |
| Goodness-of-fit on $F^2$              | 0.997                                |
| Final $R$ indices[ $I > 2\sigma(I)$ ] | $R_1^a = 0.0319$ , $wR_2^a = 0.0521$ |
| $R$ indices (all data )               | $R_1^a = 0.0655$ , $wR_2^a = 0.0605$ |

$$R_1^a = \frac{\sum ||F_o| - |F_c||}{\sum |F_o|}, wR_2^a = \left\{ \frac{\sum [w(F_o^2 - F_c^2)^2]}{\sum [w(F_o^2)^2]} \right\}^{1/2}.$$

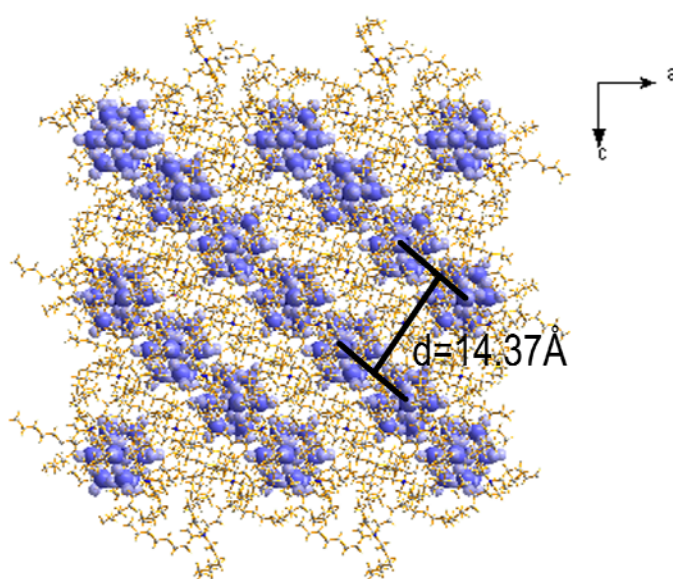

**Figure S11.** Layered structure in the crystal of TPW (view is along the  $b$  axis,  $d = 14.37 \text{ \AA}$ ).

## References

1. R. D. Claude, F. Michel, F. Raymonde and T. René, *Inorg. Chem.*, 1983, **22**, 207.
2. N. F. M. Henry and K. Lonsdale (Eds.), *International Tables for X-ray Crystallography*, Kynoch Press, Birmingham, 1952.
3. G. M. Sheldrick, *SHELXS-97: Programs for Crystal Structure Solution*, University of Göttingen, Göttingen, Germany, 1997.
